# Supplementary material for: Yolk–shell carbon microspheres with controlled yolk and void volumes and shell thickness and their application as a cathode material for Li–S batteries
Source: Royal Society of Chemistry journal article supplement (doi:10.1039/c6ta08328e), 2016-11-23
Supplement: c6ta08328e1.pdf [file c6ta08328e1.pdf]

**Yolk-shell carbon microspheres with controlled yolk and void  
volumes and shell thickness and their application as a cathode  
material for Li-S batteries**

Young Jun Hong<sup>1</sup>, Jung-Kul Lee<sup>2,\*</sup>, and Yun Chan Kang<sup>1,\*</sup>

<sup>1</sup>Department of Materials Science and Engineering, Korea University, Anam-Dong, Seongbuk-Gu, Seoul 136-713, Republic of Korea.

<sup>2</sup>Department of Chemical Engineering, Konkuk University, 1 Hwayang-dong, Gwangjin-gu, Seoul 143-701, Republic of Korea.

\*Correspondence authors. E-mail: jkrhee@konkuk.ac.kr, (Jung-Kul Lee, Fax: (+82) 2-458-3504), yckang@korea.ac.kr (Yun Chan Kang, Fax: (+82) 2-928-3584)

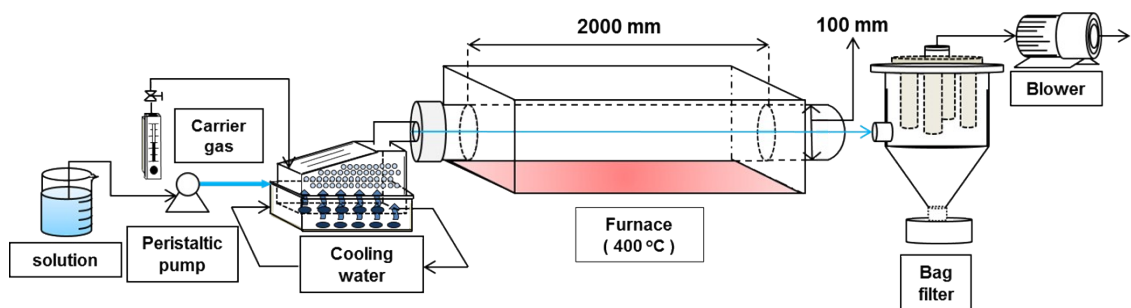

**Fig. S1.** Schematic diagram of the large-scale spray pyrolysis process applied in this study.

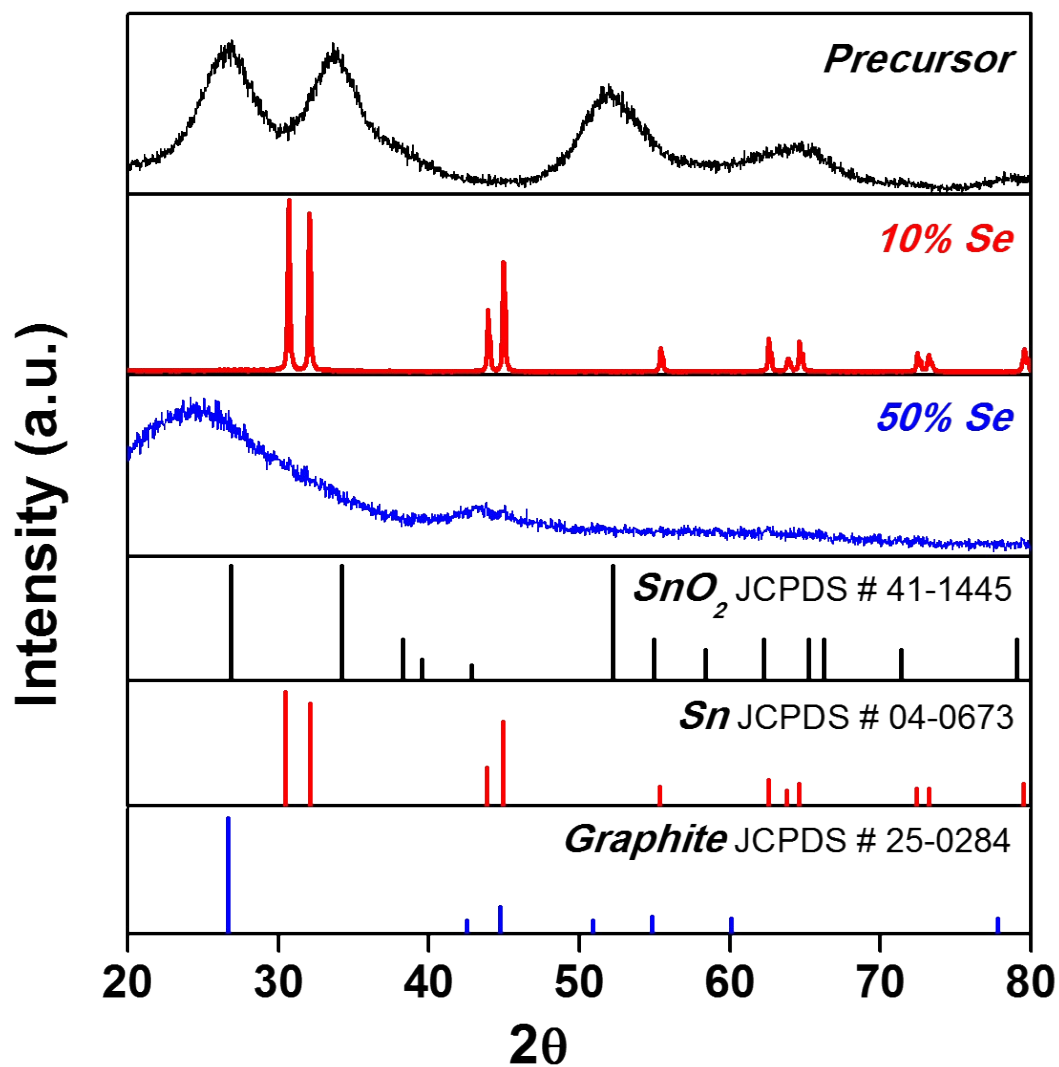

**Fig. S2.** XRD patterns of the SnO<sub>2</sub>/carbon-carbon core-shell-structured microspheres prepared from the spray solution containing Sn oxalate and PVP before and after post-treatment with different quantities of Se.

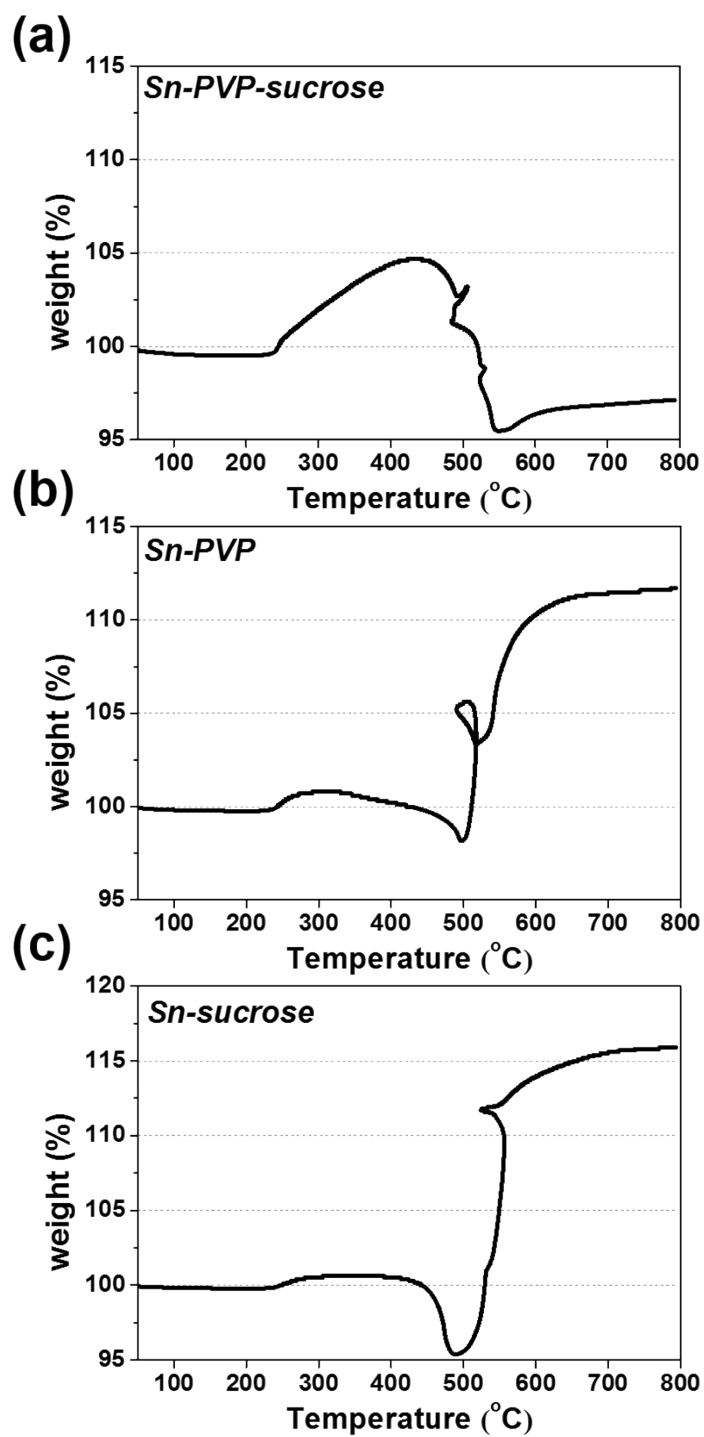

**Fig. S3.** TG curves of the Sn-C microspheres prepared from the spray solution with (a) both PVP and sucrose, (b) PVP alone, and (c) sucrose alone as carbon sources.

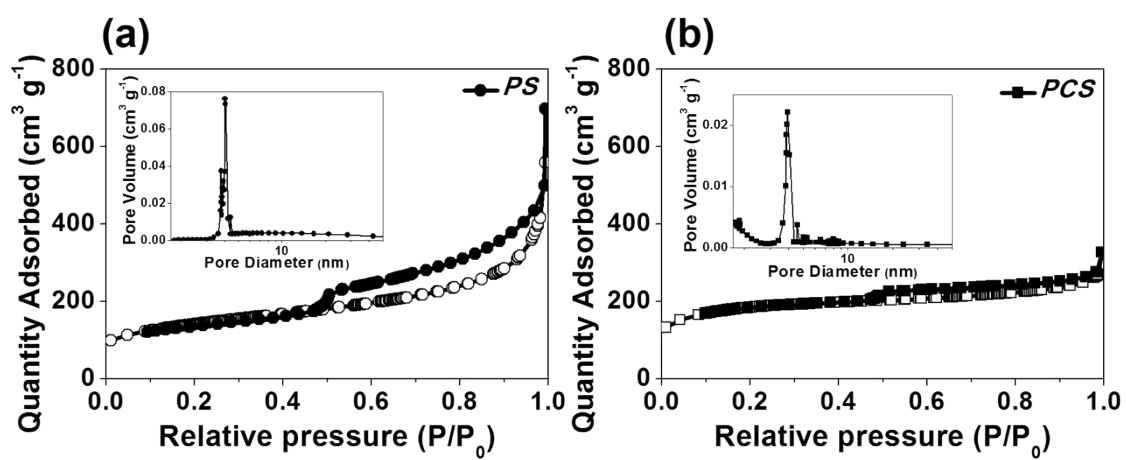

**Fig. S4.** Nitrogen adsorption and desorption isotherms and pore size distributions of the (a) PS and (b) PCS microspheres.

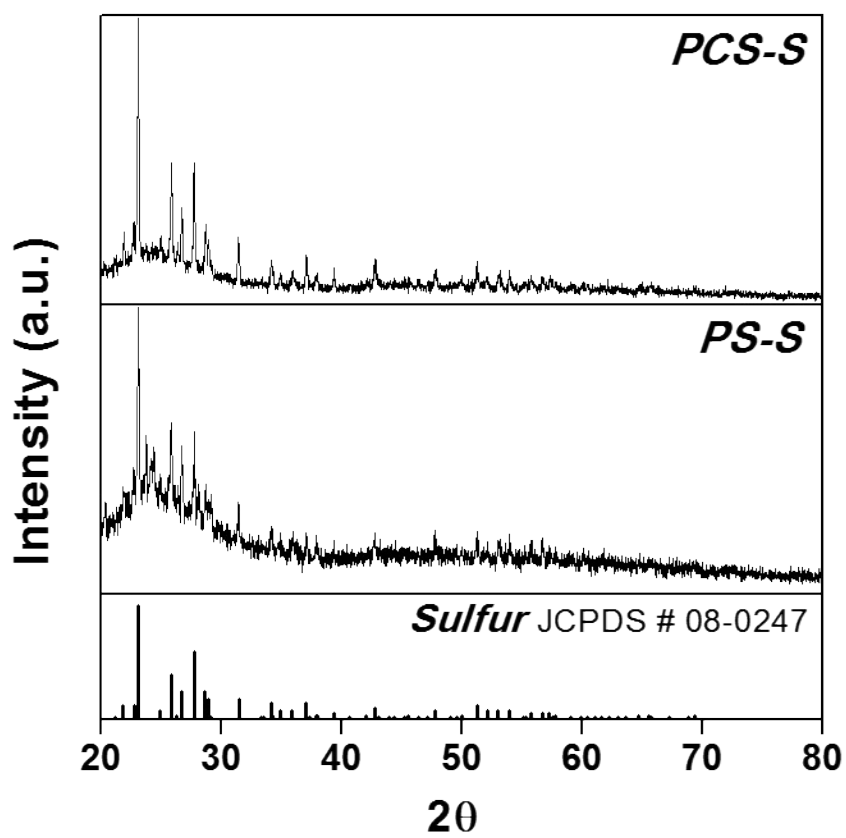

**Fig. S5.** XRD patterns of the PS-S and PCS-S microspheres.

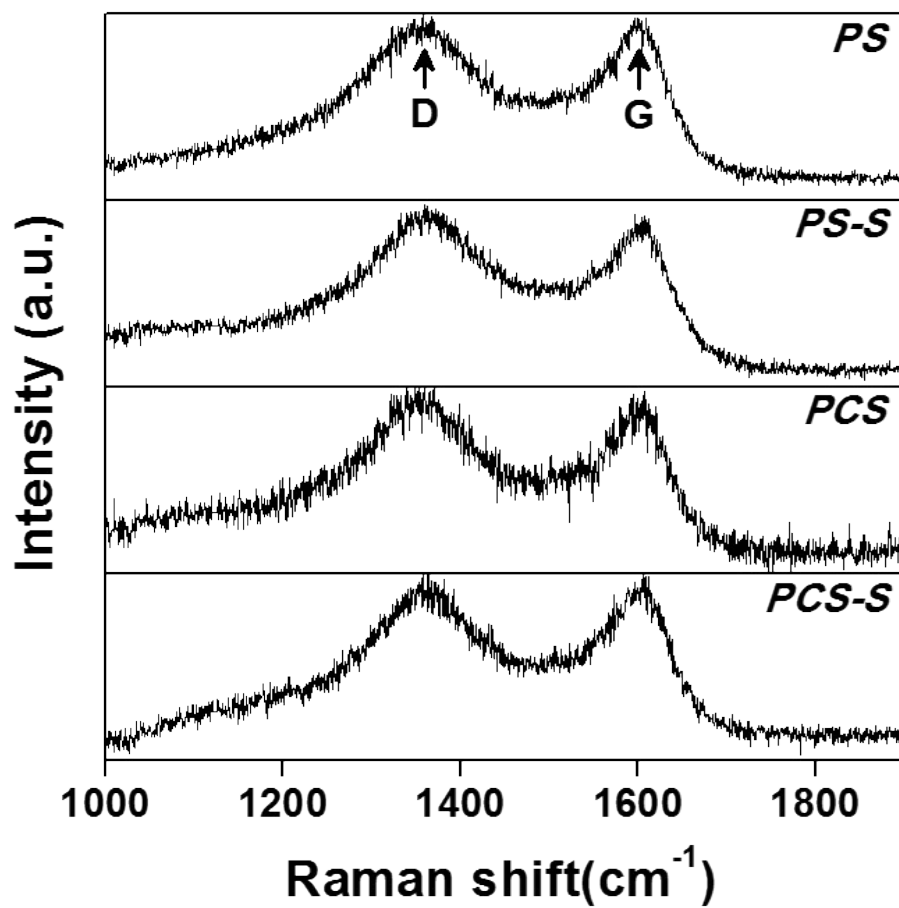

**Fig. S6.** Raman spectra of PS, PS-S, PCS, and PCS-S microspheres.

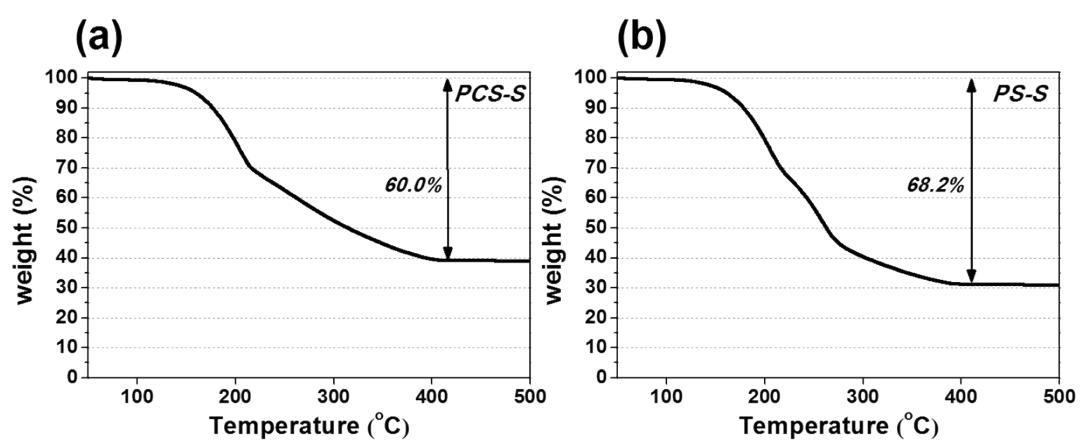

**Fig. S7.** TG curves of (a) PCS-S and (b) PS-S microspheres.



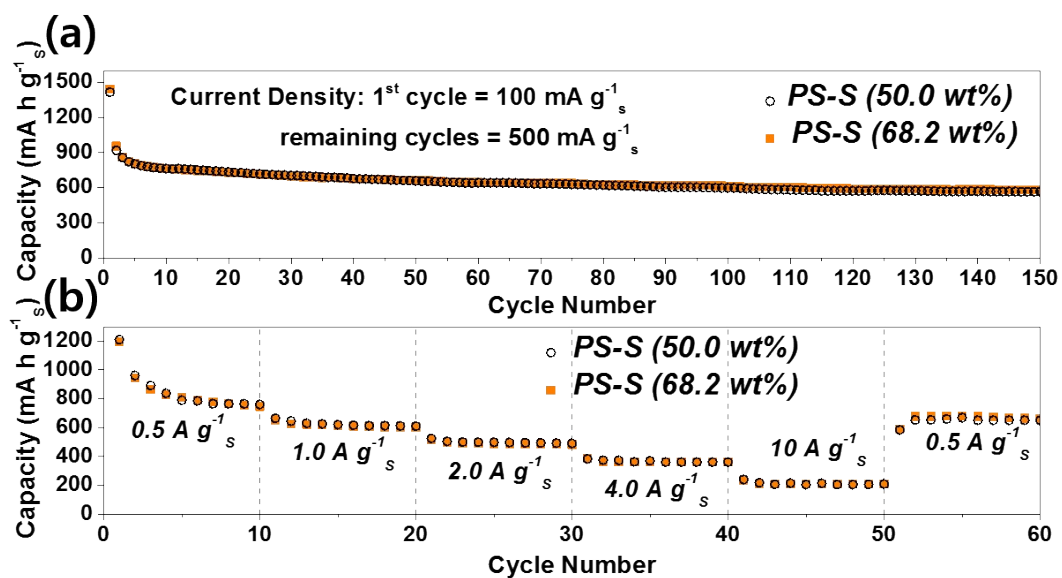

**Fig. S8.** Electrochemical properties of PS-S microspheres with 50.0 and 68.2 wt% sulfur: (a) cycling performances and (b) rate performances.

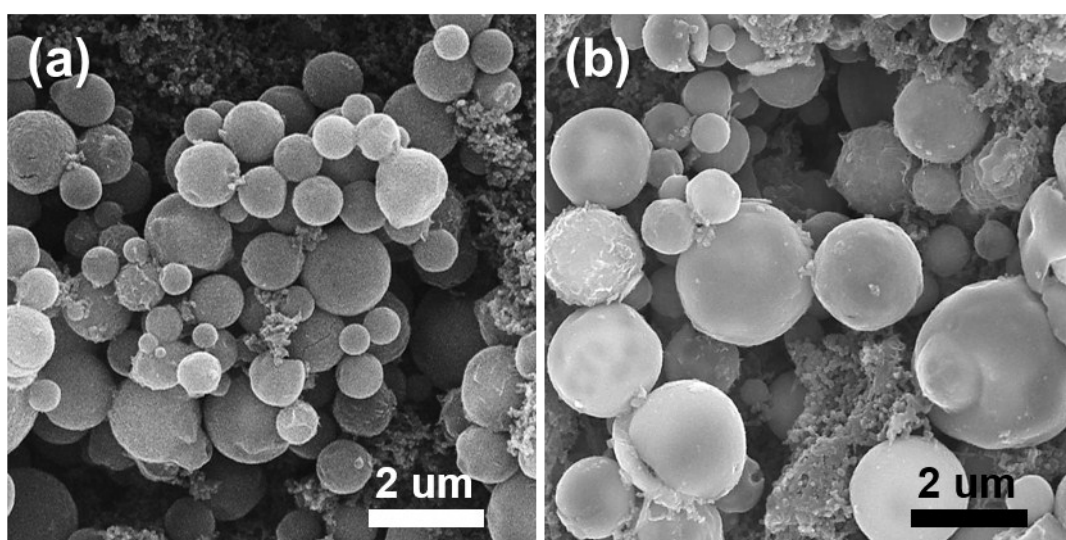

**Fig. S9.** Morphologies of the (a) PCS-S and (b) PS-S microspheres obtained after the 50<sup>th</sup> cycle.

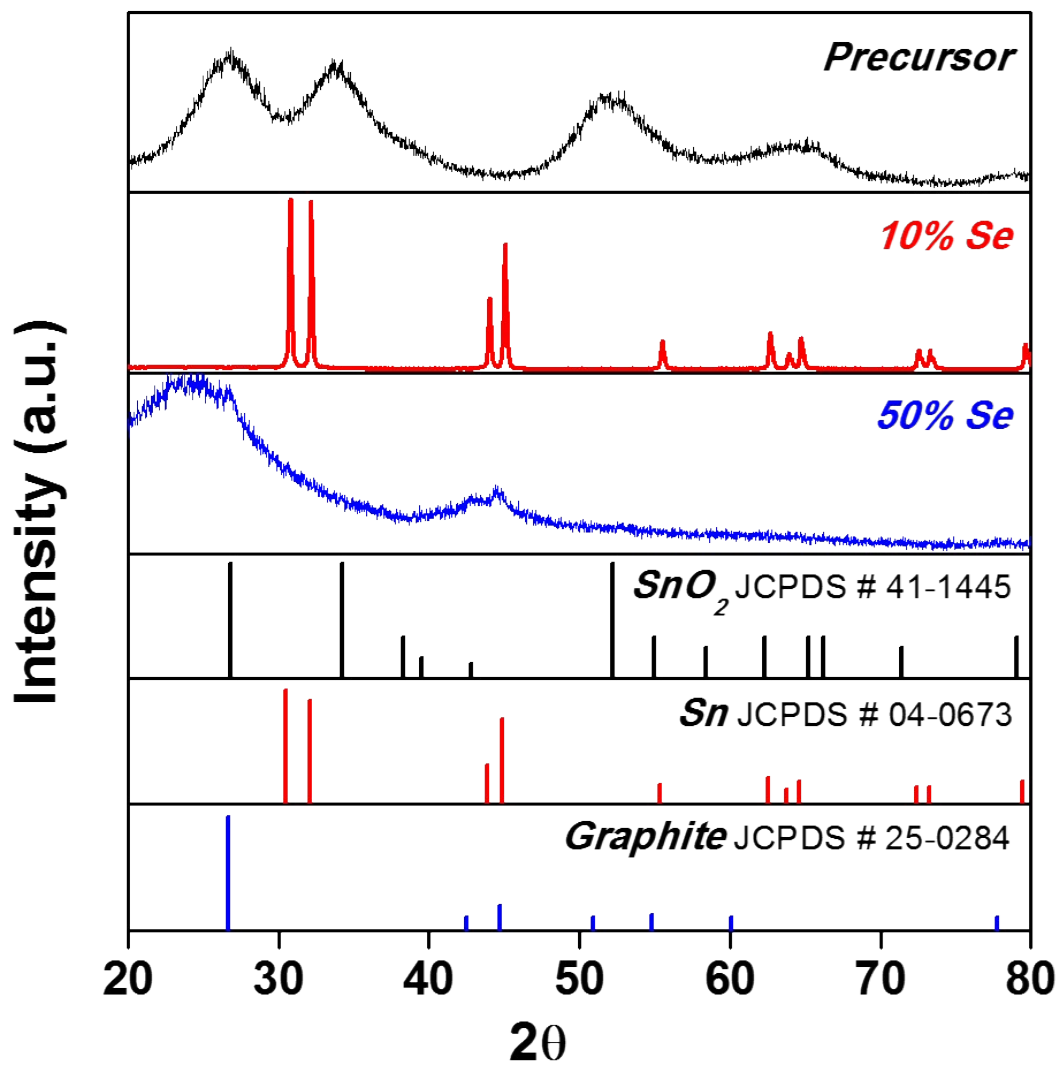

**Fig. S10.** XRD patterns of the SnO<sub>2</sub>/carbon-carbon core-shell-structured microspheres prepared from the spray solution containing Sn oxalate, PVP, and sucrose before and after post-treatment with different quantities of Se.

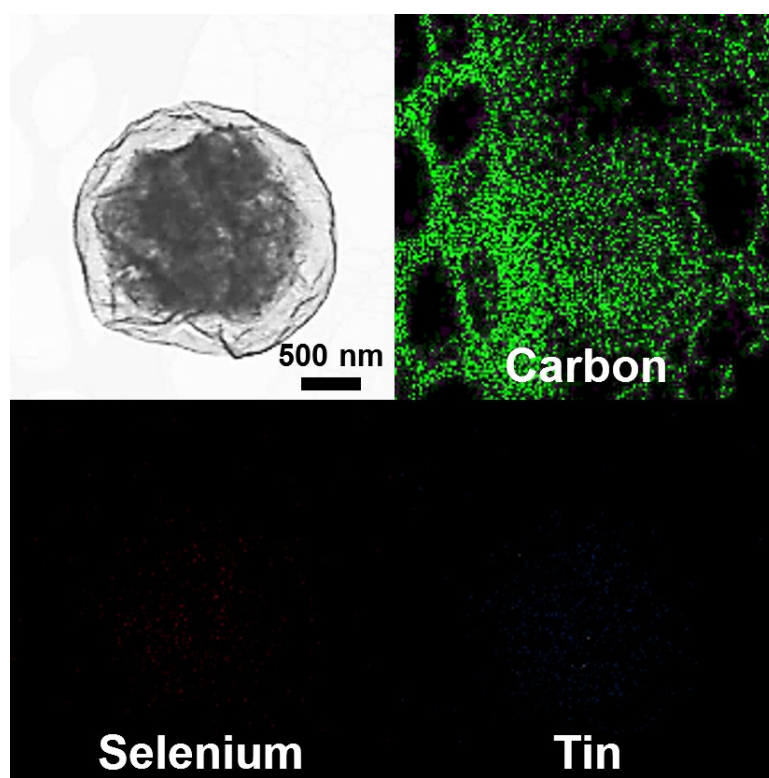

**Fig. S11.** TEM and dot-mapping images of the carbon yolk-shell microspheres prepared from the spray solution containing Sn oxalate, PVP, and sucrose.

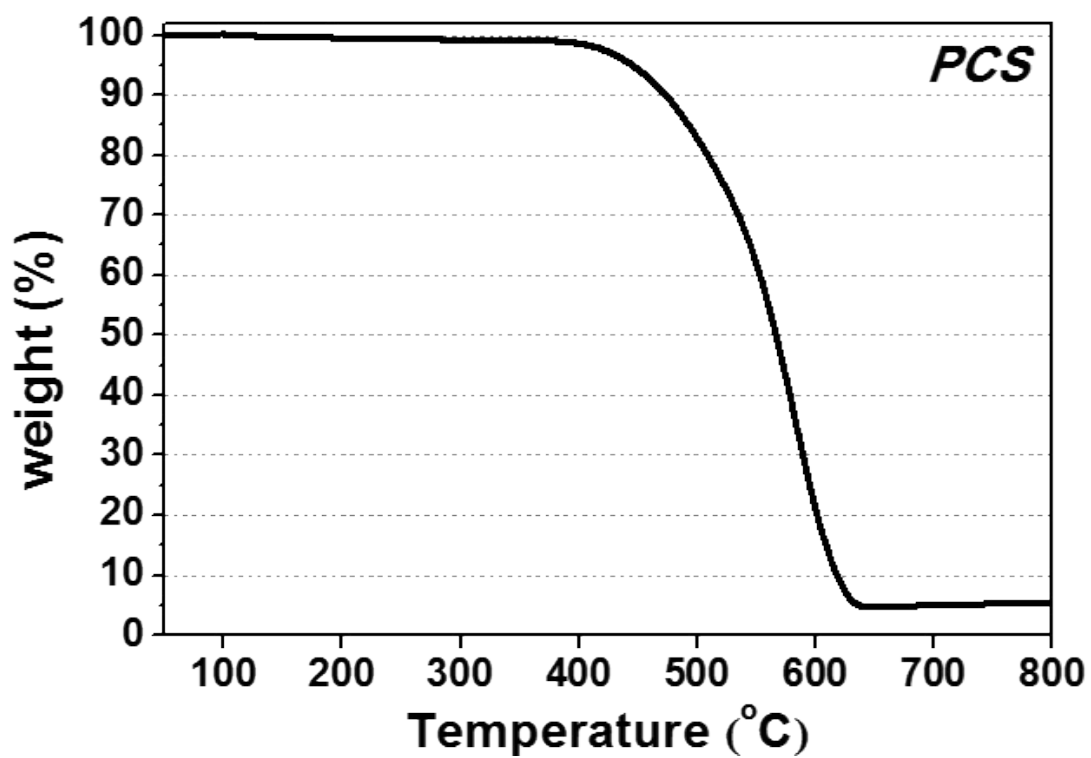

**Fig. S12.** TG curve of the carbon yolk-shell microspheres prepared from the spray solution containing Sn oxalate, PVP, and sucrose.

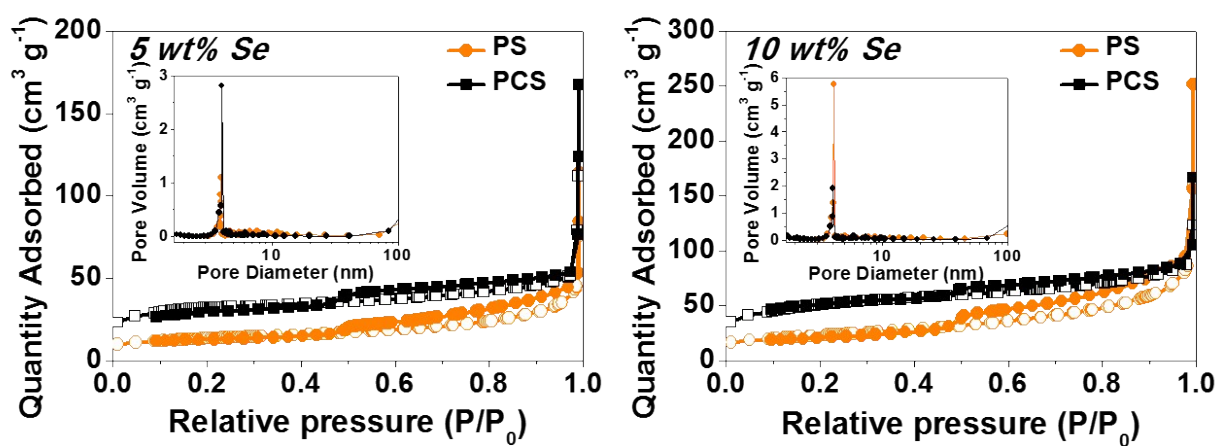

**Fig. S13.** Nitrogen adsorption and desorption isotherms of the SnO<sub>2</sub>/carbon-carbon core-shell-structured microspheres after post-treatment with different quantities of Se.

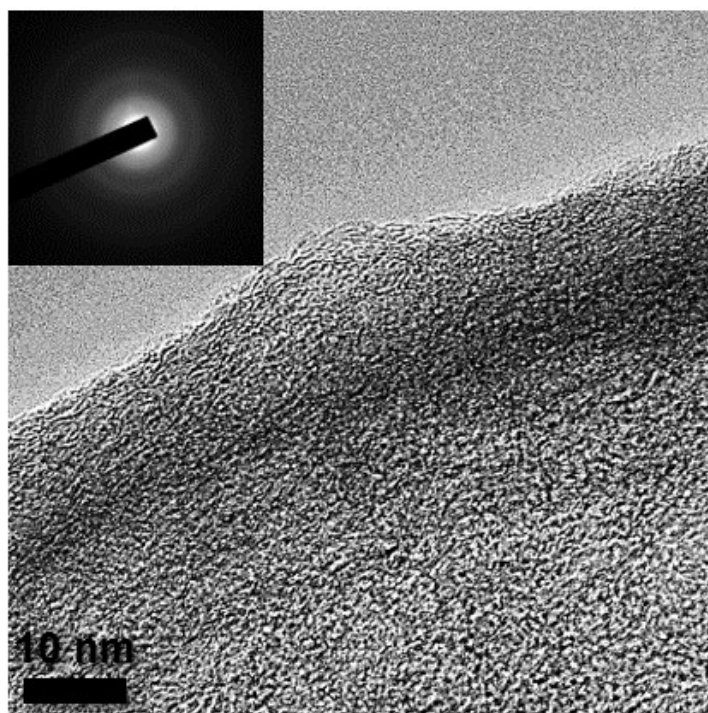

**Fig. S14.** High resolution TEM image and SAED pattern of the carbon yolk-shell microspheres prepared from the spray solution containing Sn oxalate and PVP.

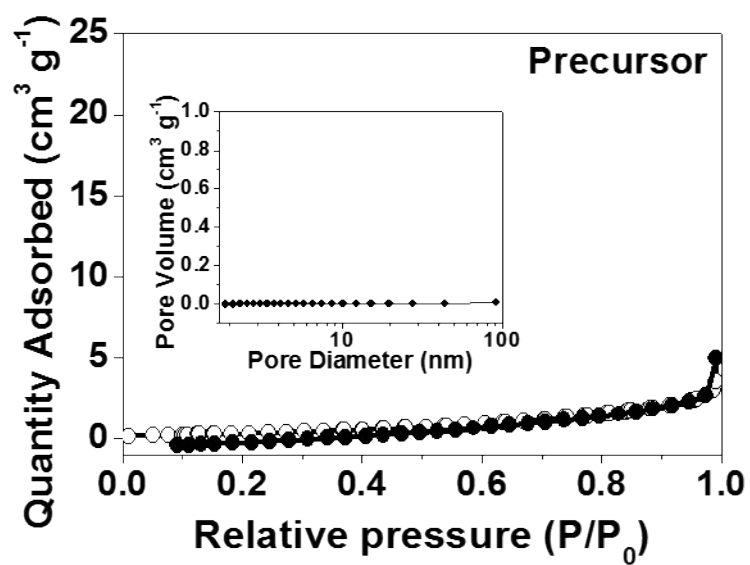

**Fig. S15.** Nitrogen adsorption and desorption isotherms of the SnO<sub>2</sub>/carbon-carbon core-shell-structured microspheres prepared from the spray solution containing Sn oxalate, PVP, and sucrose.



**Table S1.** Li-ion storage properties of the carbon materials as cathode materials for Li-S batteries reported in the previous literatures.

| Morphology<br>[preparation method]                                            | S content<br>[wt%] | Current<br>density                   | Initial $C_{\text{dis}}$<br>[mA h g <sup>-1</sup> ] <sub>s</sub> | Discharge<br>capacity<br>[mA h g <sup>-1</sup> ] <sub>s</sub> | Cycle<br>number | Ref.         |
|-------------------------------------------------------------------------------|--------------------|--------------------------------------|------------------------------------------------------------------|---------------------------------------------------------------|-----------------|--------------|
| hollow carbon nano<br>sphere [direct<br>carbonization]                        | 61                 | 837.5 mA g <sup>-1</sup><br>(0.5 C)  | 1043                                                             | 967                                                           | 100             | [22]         |
| polydopamine-coated,<br>nitrogen-doped,<br>hollow carbon [silica<br>template] | 65                 | 1003 (0.6 C)                         | 740                                                              | 630                                                           | 600             | [24]         |
| multi-shelled hollow<br>carbon nanospheres<br>[aqueous emulsion<br>approach]  | 86                 | 167.3 mA g <sup>-1</sup><br>(0.1 C)  | 1350                                                             | 1250                                                          | 200             | [25]         |
| hierarchical porous<br>carbon [spray<br>pyrolysis]                            | 46                 | 4020 mA g <sup>-1</sup><br>(2.4 C)   | 700<br>(5 <sup>th</sup> cycle)                                   | 539                                                           | 500             | [27]         |
| porous hollow carbon<br>spheres [template<br>strategy]                        | 50.2               | 83.75 mA g <sup>-1</sup><br>(0.05 C) | 1450                                                             | 1357                                                          | 50              | [28]         |
| hollow-in-hollow<br>carbon spheres<br>[template-assisted]                     | 70                 | 1000 mA g <sup>-1</sup>              | 1080<br>(3 <sup>rd</sup> cycle)                                  | 780                                                           | 300             | [38]         |
| tube-in-tube carbon<br>nanostructure [SiO <sub>2</sub><br>template]           | 71                 | 2000 mA g <sup>-1</sup>              | 659                                                              | 647                                                           | 200             | [39]         |
| double-shelled hollow<br>carbon [hard template]                               | 64                 | 167.5 mA g <sup>-1</sup><br>(0.1 C)  | ~1000                                                            | 690                                                           | 100             | [40]         |
| Yolk-shell carbon<br>microspheres [spray<br>pyrolysis]                        | 60                 | 500 mA g <sup>-1</sup>               | 908<br>(2 <sup>nd</sup> cycle)                                   | 600                                                           | 150             | This<br>work |
